# Supplementary material for: Extreme Heat and Suicide Watch Incidents Among Incarcerated Men
Source: PubMed Central journal article supplement (PMC10422184; doi:10.1001/jamanetworkopen.2023.28380), 2023-08-11
Supplement: jamanetwopen-e2328380-s001.pdf [file jamanetwopen-e2328380-s001.pdf]

## Data Sharing Statement

Cloud. Extreme Heat and Suicide Watch Incidents Among Incarcerated Men. *JAMA Netw Open*. Published August 11, 2023. doi:10.1001/jamanetworkopen.2023.28380

### Data

**Data available:** No

### Additional Information

**Explanation for why data not available:** The dataset used for this study cannot be shared per terms of a memorandum of understanding.
